# Supplementary material
Source: HighWire-hosted journal article supplement (https://www.cmajopen.ca/highwire/filestream/81076/field_highwire_adjunct_files/0/open-2016-0144-original-submission.pdf)
Supplement: open-2016-0144-original-submission.pdf [file open-2016-0144-original-submission.pdf]

1  
2  
3 Realization of entry-to-practice milestones of Canadians who studied medicine abroad and other  
4 international medical graduates  
5  
6  
7  
8

9 Maria Mathews<sup>1</sup> PhD; Rima Kandar<sup>2</sup> MSc; Steve Slade<sup>3</sup> MA; Yanqing Yi<sup>1</sup> PhD; Sue Beardall<sup>4</sup>  
10 MHSc; Ivy Bourgeault<sup>5</sup> PhD  
11  
12

13  
14 1. Division of Community Health & Humanities, Faculty of Medicine, Memorial University of  
15 Newfoundland, St. John's NL, Canada  
16

17  
18 2. Canadian Post-MD Education Registry, Association of Faculties of Medicine of Canada,  
19 Ottawa ON, Canada  
20

21  
22 3. Royal College of Physicians and Surgeons of Canada, Ottawa ON, Canada  
23

24 4. Health Canada, Government of Canada, Ottawa ON, Canada  
25

26 5. Telfer School of Management, University of Ottawa, Ottawa ON, Canada  
27  
28

29  
30 Corresponding Author: Maria Mathews  
31

32 Rm 2837, Division of Community Health & Humanities  
33

34 Health Sciences Centre, St. John's NL A1B 3V6  
35

36  
37 Email: [mmathews@mun.ca](mailto:mmathews@mun.ca)  
38

39 Fax: (709) 864-6080  
40

41 Phone: (709) 864-4991  
42  
43  
44  
45

46 Sources of Support: This study was funded by CIHR (MOP 137069) with in-kind contributions  
47 from the Canadian Post-MD Education Registry. We gratefully acknowledge the contribution of  
48 Lynda Buske and Les Forward to the project. The opinions expressed in the article are of the  
49 authors alone and not of the Canadian Post-MD Education Registry, Health Canada, or the Royal  
50 College of Physicians and Surgeons of Canada.  
51  
52

53 Word Count: 2,517  
54

55 Number of figures and tables: 3  
56  
57  
58  
59  
60

## Background

Canadians who study medicine abroad (CSA) compete with other international medical graduates (IMG) to realize milestones needed for full licensure. Besides legal status, country of training is believed to influence milestone realization. We examined the entry-to-practice milestone realization of CSA and non-CSA IMG who attended “Western” (W) and “non-Western” (NW) medical schools.

## Methods

Using the Canadian Post-MD Education Registry’s National IMG Database, we examined the rates and predictors of 1) obtaining a post-graduate position (residency/fellowship), 2) passing the Medical Council of Canada Qualifying Examination Part 2 (MCCQE2), and 3) obtaining a specialty designation. We examined non-visa, non-US IMG who had completed pre-requisites for each milestone, and who would have normally realized the milestones between 2005 and 2011 (the period covered by the Database).

## Results

Among 6,925 eligible IMG, 31% obtained a post-graduate position. Of these 1,214, 92.8% passed the MCCQE2 and 73.2% obtained a specialty designation. After controlling for other significant predictors, CSA-W (OR=4.89; 95%CI=4.00-6.00) and CSA-NW (OR=1.57; 95%CI=1.37-1.79) were more likely to obtain a post-graduate position than non-CSA-NW. There was no difference among the IMG groups in passing the MCCQE2. After controlling for other significant predictors, CSA-W (OR=4.85; 95%CI=1.21-18.64) were more likely to obtain a specialty designation than non-CSA-NW.

## Conclusion

Being a Canadian (citizen/permanent resident) and attending a Western medical school influence IMG's realization of milestones needed to enter practice in Canada. Further research is underway to examine how legal status and training site influence the selection and preparation of IMG wishing to enter practice in Canada.

**Keywords:** international medical graduates, Canadians who study abroad, credentials, residency, physician workforce, post graduate medical education

Confidential

1  
2  
3  
4 International medical graduates (IMG) are physicians who, regardless of citizenship,  
5 graduated from medical school outside of Canada. In order to obtain full licensure, IMG must  
6 verify their educational credentials, pass language proficiency tests, and pass three Medical  
7 Council of Canada (MCC) examinations (the Evaluating Examination [MCCEE], Qualifying  
8 Examination Part 1 [MCCQE1], and Qualifying Examination Part 2 [MCCQE2]) [1]. They must  
9 also pass examinations to obtain specialist credentials (Certificant of the College of Family  
10 Physicians [CCFP], Fellow of the Royal College of Physicians of Canada [FRCPC], Fellow of  
11 the Royal College of Surgeons of Canada (FRCSC)) [1, 2].  
12  
13  
14  
15  
16  
17  
18  
19  
20  
21

22 IMG must have recognized clinical experience to write the MCCQE2 and specialty  
23 examinations. Those who do not must complete post-graduate medical education (PGME)  
24 (usually residency training). Obtaining a residency position is the greatest obstacle to full  
25 licensure because there are many more applicants than positions available to IMG [3, 4, 6-12].  
26  
27  
28  
29  
30  
31

32 The term “IMG” describes a large and heterogeneous group of physicians. It includes  
33 individuals who practiced medicine in their home country before immigrating to Canada as well  
34 as physicians who came to Canada to complete their training (and have never practiced). It  
35 includes Canadian citizens or permanent residents who went abroad to study medicine (known as  
36 Canadians who studied abroad - CSA) [10, 13]. There has been a three-fold increase in the  
37 number of CSA applying for residency positions between 2006 and 2009 [8, 14]. CSA appear to  
38 be more successful than non-CSA IMG in obtaining a residency position [15]; while CSA make  
39 up roughly one-quarter of the IMG applicant pool in Ontario, they obtained over half of the  
40 available positions [9].  
41  
42  
43  
44  
45  
46  
47  
48  
49  
50  
51  
52

53 The objective of the study is to compare CSA and non-CSA IMG’s realization of three  
54 entry-to-practice milestones: obtaining a PGME training position, passing the MCCQE2, and  
55 obtaining a specialist designation. We hypothesize that CSA will be more successful in realizing  
56  
57  
58  
59  
60

1  
2 these milestones than non-CSA IMG. This study responds to calls for more information about  
3  
4 CSA and non-CSA IMG performance at the various stages of the credentialing and licensing  
5  
6 process [3, 16]. CSA proponents call for greater accommodation in the medical education  
7  
8 system for CSA, purporting CSA's prior connections to Canada, understanding of Canadian  
9  
10 culture, and superior performance in PGME training. Others advocate for greater fairness and  
11  
12 transparency, and equal treatment of all IMG [10]. This study provides evidence to assess claims  
13  
14 and inform policies.  
15  
16  
17  
18  
19  
20

## 21 **Methods**

### 22 Sources of Data

23  
24 The Newfoundland and Labrador Health Research Ethics Board (HREB#14.154)  
25  
26 approved this study. We used the National IMG Database held by the Canadian Post MD  
27  
28 Education Registry (CAPER) and includes data from various agencies involved in the training,  
29  
30 assessment, certification, and licensing of IMG [17]. Data were available on IMG in all  
31  
32 provinces and territories except Prince Edward Island, the Northwest Territories, and Nunavut.  
33  
34 The Database is the most complete and comprehensive dataset on IMG in Canada, with data  
35  
36 from 2005 to 2011 (all available years of data).  
37  
38  
39  
40  
41  
42

### 43 Primary Measurements/Outcomes

44  
45 We examined three outcomes: obtained a PGME (residency or fellowship) position  
46  
47 (Y/N), passed the MCCQE2 (Y/N), and obtained a specialty designation (Y/N). Examination  
48  
49 data were reported to the National IMG Database by the MCC, CFPC, and RCPSC. The  
50  
51 National IMG Database records the year in which an IMG passes the MCCQE2 and the year in  
52  
53 which they were awarded a specialty designation. It does not include whether an IMG wrote or  
54  
55 failed the exam. In all our analyses, we assumed that all IMG would attempt to obtain full  
56  
57  
58  
59  
60

1  
2 licensure (i.e., an IMG who realized one milestone would attempt to realize subsequent  
3  
4 milestones).

5  
6  
7 We defined CSA as IMG who were Canadian citizens or permanent residents prior to  
8 entering medical school. Preliminary analyses suggested that IMG who graduated from medical  
9 school in Western or Caribbean countries may have different outcomes than IMG who did not  
10 graduate from medical schools in these countries. We therefore created an independent variable  
11 that captured both legal status and training site, and examined four groups of IMG in the study:  
12  
13  
14  
15  
16  
17

- 18  
19 • Group 1: Canadian citizens/permanent residents who graduated from medical schools in  
20 Western and Caribbean countries (CSA-Western).  
21  
22
- 23  
24 • Group 2: Canadian citizens/permanent residents who did not graduate from medical schools  
25 in Western and Caribbean countries (CSA-nonWestern).  
26  
27
- 28  
29 • Group 3: Non-citizens/permanent residents, who graduated from medical schools in Western  
30 and Caribbean countries (nonCSA-Western).  
31  
32
- 33  
34 • Group 4: Non-Canadian citizens/permanent residents who did not graduate from medical  
35 schools in Western and Caribbean countries (nonCSA-nonWestern).  
36  
37

38 Co-variates considered in the analysis were age (younger graduate/older graduate); sex  
39 (M/F); participation in a skills assessment/training program (Y/N); and, where applicable,  
40 specialty (family medicine/specialist), and first rank (resident [PG1-7]/fellow [PG9]) [3, 18].  
41  
42 Because birthdate was not available on all IMG, we calculated the difference between year of  
43 graduation from medical school and year of realizing a standard reference (passing the  
44 MCCQE1, or if applicable, entering PGME) to create comparable age categories. We coded age  
45 as young graduate (-5 to 5 years between graduating from medical school and passing  
46 MCCQE1 or entering PGME) or older graduate (6+ years between graduating from medical  
47 school and passing MCCQE1 or entering PGME). We included both residency and fellowship  
48  
49  
50  
51  
52  
53  
54  
55  
56  
57  
58  
59  
60

1  
2  
3 training in the analysis because fellowship (additional years of clinical or research training that  
4 normally follow residency [19]) qualifies as recognized clinical experience that enables IMG to  
5 write the MCCQE2 and specialty examinations.  
6  
7  
8

9  
10 Because the National IMG Database covers a seven year period (from 2005 to 2011) and  
11 few IMG would be able to complete all steps (from MCCEE to specialty examination) needed  
12 for full licensure during that time, we examined two separate cohorts in the study. For the  
13 outcome ‘obtained PGME position’, IMG had to have passed or been exempt from the MCCQE1  
14 between 2005 and 2010. This time cut-off allows IMG at least one year to obtain a PGME  
15 position. For the outcomes ‘passed MCCQE2’ and ‘obtained specialty designation’, IMG had to  
16 have first entered a family medicine PGME program between 2005 and 2009, or have first  
17 entered a specialty PGME program in 2005 or 2006. These cut-off periods allow sufficient time  
18 for the IMG to qualify for MCCQE2, and to complete their programs and write the applicable  
19 specialty examination. We excluded IMG who first entered PGME programs before these dates  
20 because they may have passed the MCCQE2 before 2005 (before the start of the Database. The  
21 CAPER data submitted to the National IMG Database extends to 1988 and allows us to  
22 determine the first and last years in PGME training.  
23  
24  
25  
26  
27  
28  
29  
30  
31  
32  
33  
34  
35  
36  
37  
38  
39

40 We excluded graduates of US medical schools and visa trainees from the analysis. We  
41 excluded US graduates because a number of agencies in Canada categorize graduates of  
42 accredited US medical schools as Canadian medical graduates [15, 20]. We excluded visa  
43 trainees because they are expected to return to their home-country after training and may not  
44 write examinations expected of other IMG [21, 22].  
45  
46  
47  
48  
49  
50

### 51 Statistical Analysis

52  
53  
54 Using SPSS (version 23.0), we described the characteristics of the sample, and used chi-  
55 square tests between each outcome and relevant predictors. We used multiple logistic regression  
56  
57  
58  
59  
60

1  
2  
3 to identify significant ( $p < 0.05$ ) predictors for each outcome. We selected other potential  
4 predictor variables for each regression model on the basis of the chi-square tests. Variables were  
5 examined for possible co-linearity *a priori*. Predictors were removed from the model if they  
6 were not significant (based on the Wald test) and if they did not significantly improve the change  
7 in the -2 log likelihood value [23]. The tables list the variables included in the final regression  
8 models.  
9  
10  
11  
12  
13  
14  
15  
16  
17  
18

## 19 Results

20  
21 Between 2005 and 2010, 6,925 IMG had passed the MCCQE1 and were included in the  
22 cohort for the analysis of the outcome 'Obtained PGME Position'. Almost one-third (31.0%) of  
23 the IMG entered a PGME program (Table 1). The majority of the sample was nonCSA-  
24 nonWestern (67.5%), was male (54.0%), was an older graduate (65.9%), and had not participated  
25 in a skills assessment/training program (64.2%) (Table 1).  
26  
27  
28  
29  
30  
31  
32

33 Compared to IMG who did not get a PGME position, a larger proportion of IMG who  
34 obtained a PGME position was in Groups 1 and 2, was female, and was a more recent graduate  
35 (Table 2). After controlling for other significant predictors, men were 0.74 times as likely as  
36 women to get a PGME position (Table 3). More recent graduates were 1.77 times more likely to  
37 get a PGME position than older graduates. Those who had participated in a skills  
38 assessment/training program were 1.15 times more likely to get a PGME position than those who  
39 had not. CSA-Western and CSA-nonWestern IMG were 4.69 and 1.49 times more likely,  
40 respectively, to get a PGME position than nonCSA-nonWestern IMG.  
41  
42  
43  
44  
45  
46  
47  
48  
49  
50  
51

52 In the second cohort, there were 1,214 IMG who had first entered a family medicine  
53 PGME program between 2005 and 2009 or had first entered a specialty PGME program in 2005  
54 or 2006. The majority of these IMG passed the MCCQE2 (92.8%) and obtained a specialty  
55  
56  
57  
58  
59  
60



1  
2 designation (73.2%). The majority of IMG was nonCSA-nonWestern (50.3%), was female  
3  
4 (55.4%), had not participated in a skills assessment/training program (61.9%), was in a family  
5  
6 medicine PGME program (70.2%), and was a resident (92.5%) (Table 1).  
7  
8

9  
10 Compared to IMG who did not pass the MCCQE2, a larger proportion of IMG who  
11  
12 passed the MCCQE2 was female, had participated in a skills assessment/training program, was  
13  
14 in a family medicine program, and was a resident (Table 2). After controlling for other  
15  
16 significant predictors, men were 0.44 times as likely as women to pass the MCCQE2 (Table 3).  
17  
18 Younger graduates were or 0.53 times as likely as older graduates to pass the MCCQE2 and  
19  
20 those who had participated in a skills assessment/training program were 3.80 times more likely  
21  
22 to pass the exam than those who had not. Fellows were 0.05 times as likely as residents to pass  
23  
24 the MCCQE2.  
25  
26

27  
28 Compared to IMG who did not get a specialty designation, a larger proportion of IMG  
29  
30 who got a specialty designation was from Group 1, 2, and 3; was female; was a younger  
31  
32 graduate; had not participated in a skills assessment/training program; was in a family medicine  
33  
34 program; and was a resident (Table 2). After controlling for other significant predictors, male  
35  
36 IMG were 0.74 times as likely as female IMG to obtain a specialty designation (Table 3). IMG  
37  
38 who had participated in a skills assessment/training program were or 0.65 times as likely to  
39  
40 obtain a specialty designation as those who had not participated in a program. Family medicine  
41  
42 trainees were 0.59 times as likely as specialist trainees to obtain a specialist designation. Fellows  
43  
44 were or 0.16 times as likely to obtain a specialty designation as residents.  
45  
46  
47  
48  
49  
50

## 51 52 **Interpretation**

53  
54 We used the National IMG Database to examine IMG's realization of requirements for  
55  
56 full licensure. CSA were more likely to obtain a PGME position, but did not perform better than  
57  
58  
59  
60

1  
2 non-CSA in subsequent milestones. Thomson and Cohn [9] describe the role of shared values or  
3  
4 cultural competence as a possible explanation for CSA's higher success rate in obtaining  
5  
6 residency placements compared to other non-CSA IMG. In the IMG context, cultural  
7  
8 competence refers to learning the contextual subtleties of medical practice in Canada, verbal and  
9  
10 non-verbal communication skills, and adjustment to the training environment in Canada [12, 21,  
11  
12 24-34].  
13  
14

15  
16 A sizeable proportion of IMG in residency programs did not pass the MCCQE2 (up to 6  
17  
18 years after being admitted to a program) to obtain the LMCC credential (5%; 52 of 1,123; Table  
19  
20 2). Moreover, 23% (258 of 1,123; Table 2) of IMG residents did not obtain a specialty  
21  
22 designation to qualify for full licensure. These findings confirm previous studies that show IMG  
23  
24 do not perform as well as Canadian medical graduates (CMG) on CFPC or RCPSC [9, 10, 20,  
25  
26 35]. Moreover, a substantial number of IMG withdraw from the residency program or require  
27  
28 remedial training to complete their programs [20, 36]. In this study, we do not know whether  
29  
30 IMG had withdrawn from their PGME program, did not take the exam, or failed the exam  
31  
32 because these data are not reported to the National IMG Database. Residents (IMG and CMG)  
33  
34 may choose not to take the examination since they are able to practice without a specialty  
35  
36 designation (usually under a provisional license) [37], or if they do not intend to practice in  
37  
38 Canada.  
39  
40  
41  
42  
43

44  
45 While most studies only examine whether IMG obtain residency positions [10, 15, 35,  
46  
47 38, 39], we included fellows because, by providing access to recognized clinical experience,  
48  
49 fellowships enable some IMG to qualify for the MCCQE2 and speciality examinations. While  
50  
51 fellows were less likely than residents to pass the MCCQE2 or obtain a specialty designation,  
52  
53 60.4% (55 of 91; Table 2) passed the MCCQE2 and 26.4% (24 of 91; Table 2) obtained a  
54  
55  
56  
57  
58  
59  
60

1  
2  
3  
4  
5  
6  
7  
8  
9  
10  
11  
12  
13  
14  
15  
16  
17  
18  
19  
20  
21  
22  
23  
24  
25  
26  
27  
28  
29  
30  
31  
32  
33  
34  
35  
36  
37  
38  
39  
40  
41  
42  
43  
44  
45  
46  
47  
48  
49  
50  
51  
52  
53  
54  
55  
56  
57  
58  
59  
60

specialty designation. These results suggest that fellowships may offer an alternate route for some IMG to qualify for licensure in Canada.

IMG who participated in a skills assessment/training program were more likely to obtain a PGME position and pass the MCCQE2, but less likely to obtain a specialty designation. These programs are a PGME admission requirement in some provinces, which may help explain why program participants are more likely to obtain a PGME position. Moreover, given that these programs often use educational tools similar to an observed structured clinical examination, participants may be better prepared for the MCCQE2 examination, which uses a similar format. However, participation in these programs does not identify individuals who will perform well in the longer term in their training program.

The National IMG Database is a unique data set that includes data from a variety of organizations involved in the training, credentialing, and licensing of physicians. Our analyses show a number of limitations with the National IMG Database which includes data for a period of seven years. Given the sequential nature of examinations, we are unable to analyze a single cohort from the start (taking the MCCEE) to the end (obtaining a specialty designation) of the entry-to-practice process. Organizations contributed data to the Database when an IMG succeeded in accomplishing a milestone but did not provide data when an IMG was unsuccessful. As a result, we are unable to distinguish IMG who attempted to realize a milestone from those who did not. Throughout our analyses we assume that all IMG who realized one milestone will attempt to realize the subsequent milestone. As a consequence, the analyses likely underestimate true milestone realization rates by overinflating denominators.

The faculties of medicine report legal status of IMG and first rank to the Database. Since they only report on IMG who enter PGME programs, it is not possible to identify potential visa trainees or fellows prospectively. As a result, we included visa trainees or fellows (but

1  
2 ultimately were unsuccessful or did not apply) thereby overinflating the denominator and  
3  
4 lowering the overall success rate.  
5  
6  
7  
8

## 9 10 **Conclusions**

11 Among milestone-eligible IMG, 31% obtained a PGME position, 92.8% passed the  
12 MCCQE2, and 73.2% obtained a specialty designation. Roughly one in four IMG in PGME do  
13  
14 not obtain the entry-to-practice milestones required for full licensure. CSA were more likely  
15  
16 than non-CSA to obtain a PGME position, and CSA graduates from Western or Caribbean  
17  
18 countries were more likely to obtain a PGME position than other CSA. However, once in a  
19  
20 PGME program, there is no difference in the CSA and non-CSA's realization of entry-to-practice  
21  
22 milestones.  
23  
24  
25  
26  
27  
28  
29  
30  
31  
32  
33  
34  
35  
36  
37  
38  
39  
40  
41  
42  
43  
44  
45  
46  
47  
48  
49  
50  
51  
52  
53  
54  
55  
56  
57  
58  
59  
60

## References

1. Doyle S. One-stop shopping for international medical graduates. CMAJ. 2010;182(15):1608.
2. Canadian Collaborative Centre for Physician Resources. International medical graduates in Canada. Canadian Medical Association; 2008.
3. Canadian Post MD Education Registry. The National IMG Database Report. Ottawa: The Association of Faculties of Medicine of Canada; 2011.
4. Andrew R, Bates J. Program for licensure for international medical graduates in British Columbia: 7 years' experience. CMAJ. 2000;162(6):801-3.
5. Dove N. Can international medical graduates help solve Canada's shortage of rural physicians? CJRM. 2009;14(3):120-3.
6. Medical Council of Canada. Application and eligibility [Internet]. Medical Council of Canada; 2016 [cited 2016 Feb 24]. Available from: <http://mcc.ca/examinations/mccqe-part-ii/application-information/>
7. Jimenez M. A star immigrant gives up on Canada. Globe and Mail; 2005 A1.
8. The Association of Faculties of Medicine. DataPoint! International medical graduates and Canadians studying abroad [Internet]. The Association of Faculties of Medicine of Canada; 2012

1  
2  
3 November [cited 2015 Feb 20]. Available from:

4  
5 <http://www.afmc.ca/pdf/datapoint/DATAPOINT-nov2012-Eng.pdf>  
6  
7

8  
9  
10 9. Thomson G, Cohn K. IMG selection: independent review of access to postgraduate programs  
11 by international medical graduates in Ontario. Volume 1: findings and recommendations

12 [Internet]. Ontario Ministry of Health and Long-Term Care and the Council of Ontario  
13

14 Universities; September 2011a [cited 2016 Feb 20]. Available from:

15  
16 [http://www.health.gov.on.ca/en/common/ministry/publications/reports/thomson/v1\\_thomson.pdf](http://www.health.gov.on.ca/en/common/ministry/publications/reports/thomson/v1_thomson.pdf)  
17  
18

19  
20  
21  
22  
23 10. Thomson G, Cohn K. IMG selection: independent review of access to postgraduate programs  
24 by international medical graduates in Ontario. Volume 2: analysis and background.

25  
26 Ontario Ministry of Health and Long-Term Care and the Council of Ontario Universities;  
27

28  
29 September 2011b [cited 2016 Feb 20]. Available from:

30  
31 [http://www.health.gov.on.ca/en/common/ministry/publications/reports/thomson/v2\\_thomson.pdf](http://www.health.gov.on.ca/en/common/ministry/publications/reports/thomson/v2_thomson.pdf)  
32  
33

34  
35  
36  
37  
38 11. Truscott A. Moratorium urged for foreign visa trainees. *CMAJ*. 2008;178(7):638-9.  
39

40  
41  
42 12. Wong A, Lohfeld L. Recertifying as a doctor in Canada: international medical graduates and  
43 the journey from entry to adaption. *Medical Educ*. 2008;42:53-60.  
44  
45

46  
47  
48  
49 13. Banner S, McKiver A, Rattanasithy S, Cassie J, Woodward C, Ford R. Canadian students  
50 studying medicine abroad. Ottawa: Canadian Residency Matching Service; 2010.  
51  
52  
53  
54  
55  
56  
57  
58  
59  
60

1  
2  
3 14. Buske L. Number of “Canadian IMGs” seeking residency training soars. CMA Bulletin;  
4  
5 March 26 2010b.  
6

7  
8  
9 15. Szafran O, Crutcher RA, Banner SR, Watanabe M. Canadian and immigrant international  
10  
11 medical graduates. Can Fam Physician. 2005;51:1242-3.  
12  
13

14  
15  
16 16. Ministry of Health, Ministry of Advanced Education, University of British Columbia’s  
17  
18 Faculty of Medicine. International Medical Graduate Program (IMG-BC) - challenges facing  
19  
20 Canadians studying abroad. December 2011. [briefing document]  
21  
22

23  
24  
25 17. Canadian Post MD Education Registry. IMGs in Canada project - the Pearson Conference  
26  
27 Data and Analysis Plan. Ottawa: The Association of Faculties of Medicine of Canada; 2008.  
28  
29

30  
31  
32 18. Canadian Post-MD Education Registry. Instruction Manual 13<sup>th</sup> Edition. Ottawa: Association  
33  
34 of Faculties of Medicine of Canada; 2015.  
35  
36

37  
38  
39 19. Canadian Post MD Education Registry. Fact sheet: average time to complete Canadian  
40  
41 postgraduate training. Ottawa: CAPER [cited 2016 Jan 5]. Available from:  
42  
43 <http://www.caper.ca/~assets/Fact%20Sheet%20on%20time%20to%20complete%20training.pdf>  
44  
45  
46

47  
48  
49 20. MacLellan AM, Brailovsky C, Rainsberry P, Bowmer I, Desrochers M. Examination  
50  
51 outcomes for international medical graduates pursuing or completing family medicine residency  
52  
53 training in Quebec. Can Fam Physician. 2010;566: 912-8.  
54  
55  
56

- 1  
2  
3 21. Canadian Post MD Education Registry. 2011-12 Annual Census of Post MD Trainees.  
4  
5 Ottawa: The Association of Faculties of Medicine of Canada; 2012.  
6  
7  
8  
9  
10 22. Hall P, Keely E, Dojeiji S, Byszewski A, Marks M. Communication skills, cultural  
11 challenges and individual support: challenges of international medical graduates in a Canadian  
12 health care environment. *Med Teach*. 2004;26(2):120-5.  
13  
14  
15  
16  
17  
18  
19 23. Tabachnick BG, Fidell LS. Using multivariate statistics. 4<sup>th</sup> ed. Toronto: Allyn and Bacon;  
20  
21 2001.  
22  
23  
24  
25  
26 24. Armson H, Crutcher R. Orienting teachers and international medical graduates [Internet].  
27  
28 Calgary: AFMC; 2006 April [cited 2015 Feb 20]. Available from:  
29  
30 [https://www.afmc.ca/img/OTI\\_en.htm](https://www.afmc.ca/img/OTI_en.htm)  
31  
32  
33  
34  
35  
36 25. Chen PG, Nunez-Smith M, Bernheim SM, Berg D, Gozu A, Curry LA. Professional  
37 experiences of international medical graduates practicing primary care in the United States. *J*  
38 *Gen Intern Med*. 2010;25(9):947-53.  
39  
40  
41  
42  
43  
44  
45 26. Dorgan KA, Lang F, Floyd M, Kemp E. International medical graduate-patient  
46 communication: a qualitative analysis of perceived barriers. *Acad Med*. 2009;84(11):1567-75.  
47  
48  
49  
50  
51  
52 27. Fiscella K, Roman-Diaz M, Lue BH, Botelho R, Frankel R. 'Being a foreigner, I may be  
53 punished if I make a small mistake': assessing transcultural experiences in caring for patients.  
54  
55 *Fam Pract*. 1997;14(2):112-6.  
56  
57  
58  
59  
60



- 1  
2  
3  
4  
5 28. Jain P, Krieger L. Moving beyond the language barrier: the communication strategies used  
6  
7 by international medical graduates in intercultural medical encounters. *Patient Educ Couns*.  
8  
9 2011;84(1):98-104.  
10  
11  
12  
13  
14 29. McDonnell L, Usherwood T. International medical graduates- challenges faced in the  
15  
16 Australian training program. *Aust Fam Physician*. 2008;37(6):481-4.  
17  
18  
19  
20  
21 30. Neiterman E, Bourgeault IL. The gender dimensions of Canadian policies and programs for  
22  
23 integrating internationally educated health-care professionals. *WIGS*. 2008;(1):1-20.  
24  
25  
26  
27  
28 31. Pilotto LS, Duncan GF, Anderson-Wurf J. Issues for clinicians training international  
29  
30 graduates: a systematic review. *Med J Australia*. 2007;187(4):225-8.  
31  
32  
33  
34  
35 32. Steinert Y. Building on diversity: a faculty development program for teachers of international  
36  
37 medical graduates [Internet]. Ottawa: Canadian Task Force on Licensure of International  
38  
39 Medical Graduates; 2003 [cited 2015 Feb 20]. Available from:  
40  
41 [https://www.afmc.ca/img/pdf/Intro\\_AppA\\_en.pdf](https://www.afmc.ca/img/pdf/Intro_AppA_en.pdf)  
42  
43  
44  
45  
46  
47 33. Swygert KA, Cuddy MM, Zanten M, Haist SA, Jobe AC. Gender differences in examinee  
48  
49 performance on the Step 2 Clinical Skills data gathering (DG) and patient note (PN) components.  
50  
51 *Adv Health Sci Educ*. 2012;(17):557-71.  
52  
53  
54  
55  
56  
57  
58  
59  
60

1  
2  
3 34. Walsh A, Banner S, Schabert I, Armson H, Bowmer MI, Granata B. International medical  
4 graduates- current issues [Internet]. Members of the FMEC PG consortium; 2011 [cited 2015  
5 Feb 20]. Available from:

6  
7  
8  
9 [http://www.afmc.ca/pdf/fmec/05\\_Walsh\\_IMG%20Current%20Issues.pdf](http://www.afmc.ca/pdf/fmec/05_Walsh_IMG%20Current%20Issues.pdf)  
10  
11

12  
13  
14 35. Andrew RF. How do IMGs compare with Canadian medical school graduates in a family  
15 practice residency program? Can Fam Physician. 2010;56:e318-22.  
16  
17

18  
19  
20  
21 36. Bates, J, Andrew R. Untangling the roots of some IMGs poor academic performance. Acad  
22 Med. 2001;76(1):43-6.  
23  
24

25  
26  
27  
28 37. Fleming P, Mathews M. Retention of specialist physicians in Newfoundland and Labrador.  
29 Open Med 2012; 6(1):e1-9.  
30  
31

32  
33  
34  
35 38. Buske L. Is medicine a closed shop? Study says no. CMAJ. 2010a;182(6):1.  
36  
37

38  
39  
40 39. Desbiens NA, Vidaillet HJ. Discrimination against international medical graduates in the  
41 United States residency program selection process. BMC Med Educ. 2010;10:e1-5.  
42  
43  
44  
45  
46  
47  
48  
49  
50  
51  
52  
53  
54  
55  
56  
57  
58  
59  
60

Table 1: Characteristics of eligible IMG in the study

| Characteristics                                                                                                                                                                                                                                                                                                                                                  | IMG* (n=6,925)<br>n (%) | IMG** (n=1214)<br>n (%) |
|------------------------------------------------------------------------------------------------------------------------------------------------------------------------------------------------------------------------------------------------------------------------------------------------------------------------------------------------------------------|-------------------------|-------------------------|
| <b>Obtained PGME</b>                                                                                                                                                                                                                                                                                                                                             |                         |                         |
| Yes                                                                                                                                                                                                                                                                                                                                                              | 2,144 (31.0)            | -                       |
| No                                                                                                                                                                                                                                                                                                                                                               | 4,781 (69.0)            | -                       |
| <b>Passed MCCQE2</b>                                                                                                                                                                                                                                                                                                                                             |                         |                         |
| Yes                                                                                                                                                                                                                                                                                                                                                              | -                       | 1,126 (92.8)            |
| No                                                                                                                                                                                                                                                                                                                                                               | -                       | 88 (7.2)                |
| <b>Got Specialty Designation</b>                                                                                                                                                                                                                                                                                                                                 |                         |                         |
| Yes                                                                                                                                                                                                                                                                                                                                                              | -                       | 889 (73.2)              |
| No                                                                                                                                                                                                                                                                                                                                                               | -                       | 325 (26.8)              |
| <b>Type of IMG</b>                                                                                                                                                                                                                                                                                                                                               |                         |                         |
| Group 1: CSA-Western                                                                                                                                                                                                                                                                                                                                             | 649 (9.4)               | 196 (16.1)              |
| Group 2: CSA-nonWestern                                                                                                                                                                                                                                                                                                                                          | 1375 (19.9)             | 382 (31.5)              |
| Group 3: NonCSA-Western                                                                                                                                                                                                                                                                                                                                          | 229 (3.3)               | 25 (2.1)                |
| Group 4: NonCSA- nonWestern                                                                                                                                                                                                                                                                                                                                      | 4672 (67.5)             | 611 (50.3)              |
| <b>Gender</b>                                                                                                                                                                                                                                                                                                                                                    |                         |                         |
| Female                                                                                                                                                                                                                                                                                                                                                           | 3185 (46.0)             | 673 (55.4)              |
| Male                                                                                                                                                                                                                                                                                                                                                             | 3739 (54.0)             | 541 (44.6)              |
| <b>IMG Age</b>                                                                                                                                                                                                                                                                                                                                                   |                         |                         |
| Younger graduate                                                                                                                                                                                                                                                                                                                                                 | 2329 (33.6)             | 462 (38.1)              |
| Older graduate                                                                                                                                                                                                                                                                                                                                                   | 4562 (65.9)             | 752 (61.9)              |
| Missing Information                                                                                                                                                                                                                                                                                                                                              | 34 (0.5)                | 0 (0)                   |
| <b>Had Skills Assessment</b>                                                                                                                                                                                                                                                                                                                                     |                         |                         |
| Yes                                                                                                                                                                                                                                                                                                                                                              | 2482 (35.8)             | 302 (24.9)              |
| No                                                                                                                                                                                                                                                                                                                                                               | 4443 (64.2)             | 912 (75.1)              |
| <b>Specialty Type</b>                                                                                                                                                                                                                                                                                                                                            |                         |                         |
| Family Medicine                                                                                                                                                                                                                                                                                                                                                  | 880 (12.7)              | 852 (70.2)              |
| Specialist                                                                                                                                                                                                                                                                                                                                                       | 1264 (18.3)             | 362 (29.8)              |
| Missing                                                                                                                                                                                                                                                                                                                                                          | 4781 (69.0)             |                         |
| <b>First Rank</b>                                                                                                                                                                                                                                                                                                                                                |                         |                         |
| Residents                                                                                                                                                                                                                                                                                                                                                        | -                       | 1123 (92.5)             |
| Fellows                                                                                                                                                                                                                                                                                                                                                          | -                       | 91 (7.5)                |
| * Passed MCCQE1 between 2005 and 2010; ** Entered family medicine PGME program between 2005 and 2009 or specialty PGME program in 2005 or 2006; IMG – international medical graduate; MCCQE1 – Medical Council of Canada Qualifying Examination Part 1; MCCQE2 – Medical Council of Canada Qualifying Examination Part 2; PGME – post-graduate medical education |                         |                         |

**Table 2: Characteristics of IMG who obtained and did not obtain a PGME position, passed and did not pass the MCCQE2, and obtained and did not obtain a specialty designation**

| Characteristics              | Obtained PGME position* |              | p value | Passed MCCQE2* |           | p value | Obtained Specialty Designation** |            | p value |
|------------------------------|-------------------------|--------------|---------|----------------|-----------|---------|----------------------------------|------------|---------|
|                              | Yes                     | No           |         | Yes            | No        |         | Yes                              | No         |         |
| <b>Type of IMG</b>           |                         |              | 0.000   |                |           | 0.339   |                                  |            | 0.011   |
| Group 1: CSA-Western         | 430 (20.1)              | 219 (4.6)    |         | 180 (16.0)     | 16 (18.2) |         | 158 (17.8)                       | 38 (11.7)  |         |
| Group 2: CSA-nonWestern      | 486 (22.7)              | 889 (18.6)   |         | 362 (32.1)     | 20 (22.7) |         | 280 (31.5)                       | 102 (31.4) |         |
| Group 3: NonCSA-Western      | 55 (2.6)                | 174 (3.6)    |         | 23 (2.0)       | 2 (2.3)   |         | 22 (2.5)                         | 3 (0.9)    |         |
| Group 4: NonCSA- nonWestern  | 1173 (54.7)             | 3499 (73.2)  |         | 561 (49.8)     | 50 (56.8) |         | 429 (48.3)                       | 182 (56.0) |         |
| <b>Gender</b>                |                         |              | 0.000   |                |           | 0.000   |                                  |            | 0.004   |
| Female                       | 1107 (51.6)             | 2078 (43.5)  |         | 643 (57.1)     | 30 (34.1) |         | 515 (57.9)                       | 158 (48.6) |         |
| Male                         | 1037 (48.4)             | 2702 (56.5)  |         | 483 (42.9)     | 58 (65.9) |         | 374 (42.1)                       | 167 (51.4) |         |
| <b>IMG age</b>               |                         |              | 0.000   |                |           | 0.424   |                                  |            | 0.006   |
| Younger graduate             | 1049 (48.9)             | 1280 (26.8)  |         | 425 (37.7)     | 37 (42.0) |         | 359 (40.4)                       | 103 (31.7) |         |
| Older graduate               | 1094 (51.0)             | 3468 (72.5)  |         | 701 (62.3)     | 51 (58.0) |         | 530 (59.6)                       | 222 (68.3) |         |
| Missing Information          | 1 (0.0)                 | 33 (0.7)     |         |                |           |         |                                  |            |         |
| <b>Had Skills Assessment</b> |                         |              | 0.168   |                |           | 0.001   |                                  |            | 0.023   |
| Yes                          | 743 (34.7)              | 1739 (36.4)  |         | 293 (26.0)     | 9 (10.2)  |         | 206 (23.2)                       | 96 (29.5)  |         |
| No                           | 1401 (65.3)             | 3042 (63.6)  |         | 833 (74.0)     | 79 (89.8) |         | 683 (76.8)                       | 229 (70.5) |         |
| <b>Specialty Type</b>        |                         |              | 0.000   |                |           | 0.000   |                                  |            | 0.000   |
| Family Medicine              | 880 (41.0)              | 0 (0)        |         | 817 (72.6)     | 35 (39.8) |         | 672 (75.6)                       | 180 (55.4) |         |
| Specialist                   | 1264 (59.0)             | 0 (0)        |         | 309 (27.4)     | 53 (60.2) |         | 217 (24.4)                       | 145 (44.6) |         |
| No PGME position             | 0 (0)                   | 4781 (100.0) |         |                |           |         | -                                | -          |         |
| <b>First Rank</b>            |                         |              | -       |                |           | 0.000   |                                  |            | 0.000   |
| Residents                    | -                       | -            |         | 1071 (95.1)    | 52 (59.1) |         | 865 (97.3)                       | 258 (79.4) |         |
| Fellows                      | -                       | -            |         | 55 (4.9)       | 36 (40.9) |         | 24 (2.7)                         | 67 (20.6)  |         |

\* Passed MCCQE1 between 2005 and 2010; \*\* Entered family medicine PGME program between 2005 and 2009 or specialty PGME program in 2005 or 2006; IMG – international medical graduate; MCCQE1 – Medical Council of Canada Qualifying Examination Part 1; MCCQE2 – Medical Council of Canada Qualifying Examination Part 2; PGME – post-graduate medical education

Table 3: Predictors of IMG who realized entry-to-practice milestones: obtained a PGME position, passed MCCQE2, and obtained a specialty designation

| Variable                                                                                                                                                                                                                                                                                                                                                                                                      | Obtained PGME position* |         | Passed MCCQE2*   |         | Obtained Specialty Designation** |         |
|---------------------------------------------------------------------------------------------------------------------------------------------------------------------------------------------------------------------------------------------------------------------------------------------------------------------------------------------------------------------------------------------------------------|-------------------------|---------|------------------|---------|----------------------------------|---------|
|                                                                                                                                                                                                                                                                                                                                                                                                               | OR (95% CI)             | p value | OR (95% CI)      | P value | OR (95% CI)                      | P value |
| <b>Gender</b>                                                                                                                                                                                                                                                                                                                                                                                                 |                         | 0.000   |                  | 0.001   |                                  | 0.026   |
| Female                                                                                                                                                                                                                                                                                                                                                                                                        | 1.00                    |         | 1.00             |         | 1.00                             |         |
| Male                                                                                                                                                                                                                                                                                                                                                                                                          | 0.74 (0.66-0.82)        |         | 0.44 (0.27-0.73) |         | 0.74 (0.56-0.96)                 |         |
| <b>IMG Age</b>                                                                                                                                                                                                                                                                                                                                                                                                |                         | 0.000   |                  | 0.019   |                                  | N/S     |
| Younger graduate                                                                                                                                                                                                                                                                                                                                                                                              | 1.77 (1.57-2.00)        | 0.000   | 0.53 (0.31-0.90) |         | N/S                              |         |
| Older graduate                                                                                                                                                                                                                                                                                                                                                                                                | 1.00                    |         | 1.00             |         | N/S                              |         |
| Missing Information                                                                                                                                                                                                                                                                                                                                                                                           | 0.03 (0.04-0.22)        | 0.001   | -                |         | N/S                              |         |
| <b>Had Skills Assessment</b>                                                                                                                                                                                                                                                                                                                                                                                  |                         | 0.018   |                  | 0.001   |                                  | 0.006   |
| No                                                                                                                                                                                                                                                                                                                                                                                                            | 1.00                    |         | 3.80 (1.75-8.26) |         | 0.65 (0.48-0.89)                 |         |
| Yes                                                                                                                                                                                                                                                                                                                                                                                                           | 1.15 (1.02-1.29)        |         | 1.00             |         | 1.00                             |         |
| <b>Type of IMG</b>                                                                                                                                                                                                                                                                                                                                                                                            |                         | 0.000   |                  | N/S     |                                  | N/S     |
| Group 1: CSA-Western                                                                                                                                                                                                                                                                                                                                                                                          | 4.69 (3.82-5.71)        | 0.000   | N/S              |         | N/S                              |         |
| Group 2: CSA-nonWestern                                                                                                                                                                                                                                                                                                                                                                                       | 1.49 (1.31-1.70)        | 0.000   | N/S              |         | N/S                              |         |
| Group 3: NonCSA-Western                                                                                                                                                                                                                                                                                                                                                                                       | 0.96 (0.70-1.32)        | 0.813   | N/S              |         | N/S                              |         |
| Group 4: NonCSA- nonWestern                                                                                                                                                                                                                                                                                                                                                                                   | 1.00                    |         | N/S              |         | N/S                              |         |
| <b>Specialty Type</b>                                                                                                                                                                                                                                                                                                                                                                                         |                         | N/S     |                  | N/S     |                                  | 0.001   |
| Family Medicine                                                                                                                                                                                                                                                                                                                                                                                               | N/S                     |         | N/S              |         | 0.59 (0.44-0.80)                 |         |
| Specialist                                                                                                                                                                                                                                                                                                                                                                                                    | N/S                     |         | N/S              |         | 1.00                             |         |
| <b>First Rank</b>                                                                                                                                                                                                                                                                                                                                                                                             |                         | N/S     |                  | 0.000   |                                  | 0.000   |
| Residents                                                                                                                                                                                                                                                                                                                                                                                                     | N/S                     |         | 1.00             |         | 1.00                             |         |
| Fellows                                                                                                                                                                                                                                                                                                                                                                                                       | N/S                     |         | 0.05 (0.03-0.09) |         | 0.16 (0.09-0.26)                 |         |
| * Passed MCCQE1 between 2005 and 2010; ** Entered family medicine PGME program between 2005 and 2009 or specialty PGME program in 2005 or 2006; IMG – international medical graduate; MCCQE1 – Medical Council of Canada Qualifying Examination Part 1; MCCQE2 – Medical Council of Canada Qualifying Examination Part 2; PGME – post-graduate medical education; N/S – not significant/not included in model |                         |         |                  |         |                                  |         |
